# Supplementary material for: Visualization of Swift Ion Tracks in Suspended Local Diamondized Few-Layer Graphene
Source: MDPI journal article supplement (doi:10.3390/ma16041391), 2023-02-07
Supplement: s1 [file s1]

# Visualization of Swift Ion Tracks in Suspended Local Diamondized Few-Layer Graphene

Nadezhda A. Nebogatikova <sup>1,\*</sup>, Irina V. Antonova <sup>1,2</sup>, Anton K. Gutakovskii <sup>1,3</sup>, Dmitriy V. Smovzh <sup>4</sup>, Vladimir A. Volodin <sup>1,3</sup> and Pavel B. Sorokin <sup>5,\*</sup>

<sup>1</sup> Rzhanov Institute of Semiconductor Physics of the Siberian Branch of the RAS, Novosibirsk 630090, Russia; ifp@isp.nsc.ru (I.V.A.); inter@nstu.ru (A.K.G.); director@itp.nsc.ru (V.A.V.)

<sup>2</sup> Department of Semiconductor Devices and Microelectronics, Novosibirsk State Technical University, Novosibirsk 630087, Russia

<sup>3</sup> Physical Department, Novosibirsk State University, Novosibirsk 630090, Russia

<sup>4</sup> Kutateladze Institute of Thermophysics, Siberian Branch of the Russian Academy of Sciences, Novosibirsk 630090, Russia; rector@nsu.ru

<sup>5</sup> Technological Institute for Superhard and Novel Carbon Materials, Moscow 108840, Russia

\* Correspondence: nadonebo@gmail.com (N.A.N.); pbsorokin@tisnum.ru (P.B.S.)

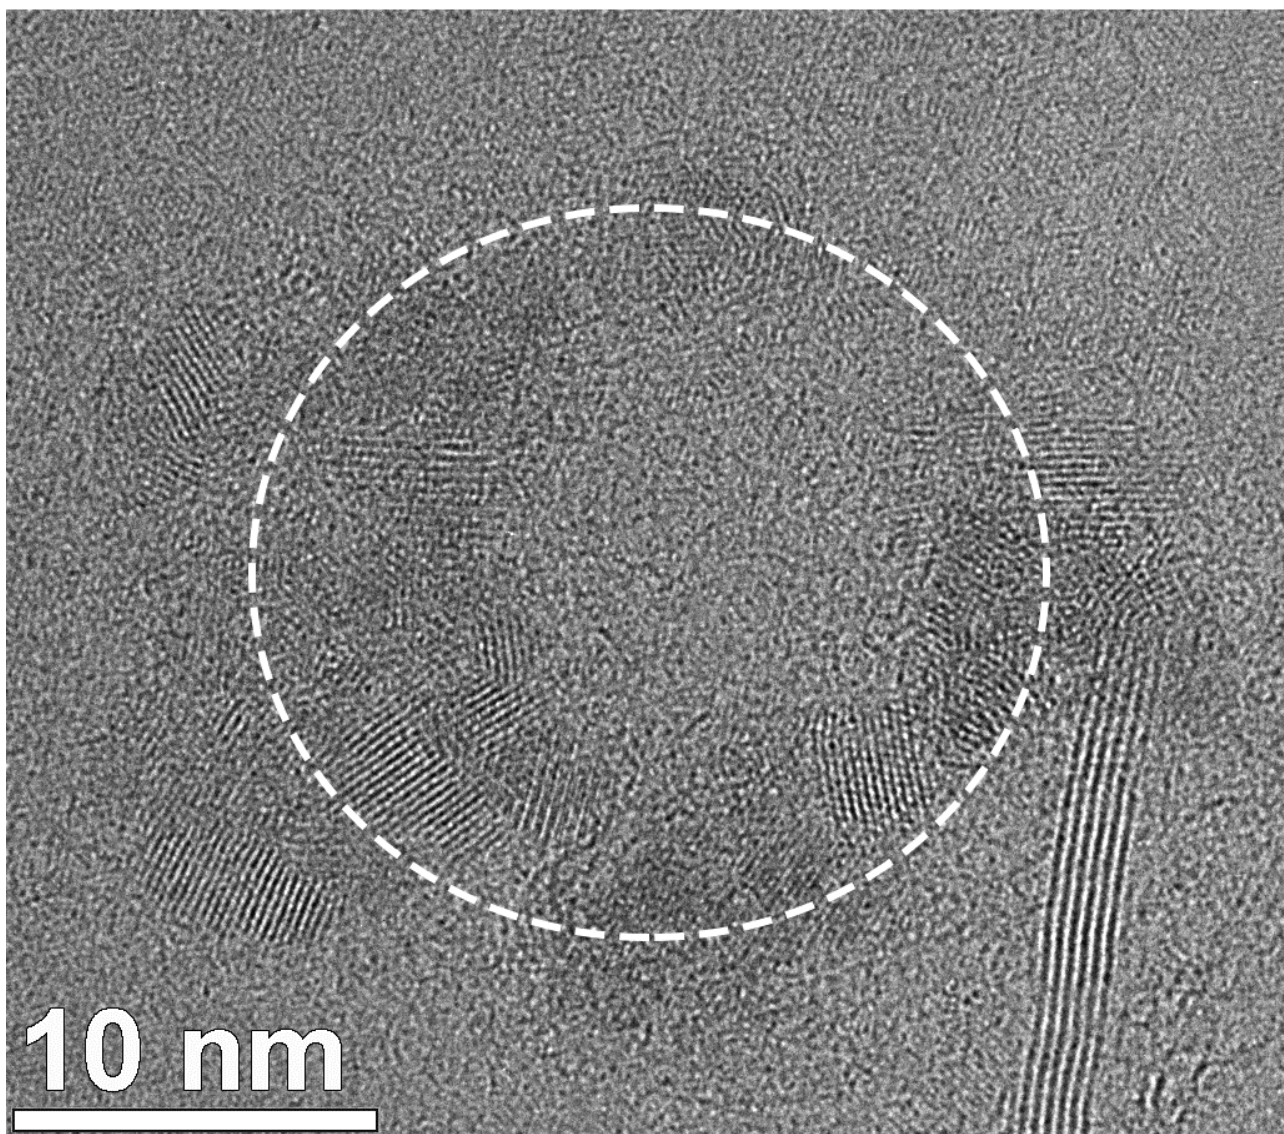

Figure S1: Cluster of nanocrystals at the periphery of the ion track at the irradiation dose of  $1 \times 10^{11}$  ion/cm<sup>2</sup>, ion energy is 167 MeV.

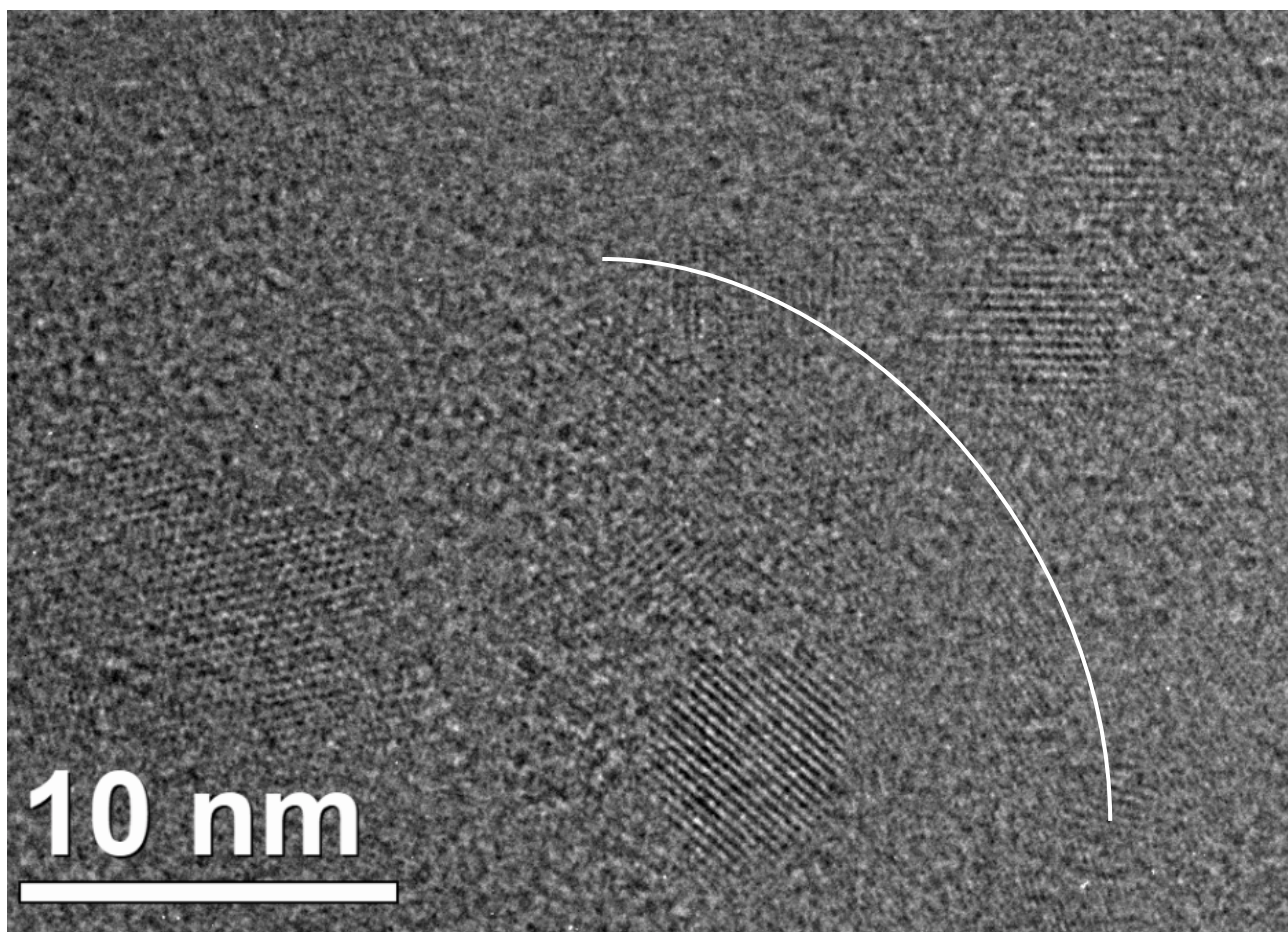

Figure S2: Cluster of nanocrystals at the periphery of the ion track at the irradiation dose of  $1 \times 10^{11}$  ion/cm<sup>2</sup>, ion energy is 26 MeV.

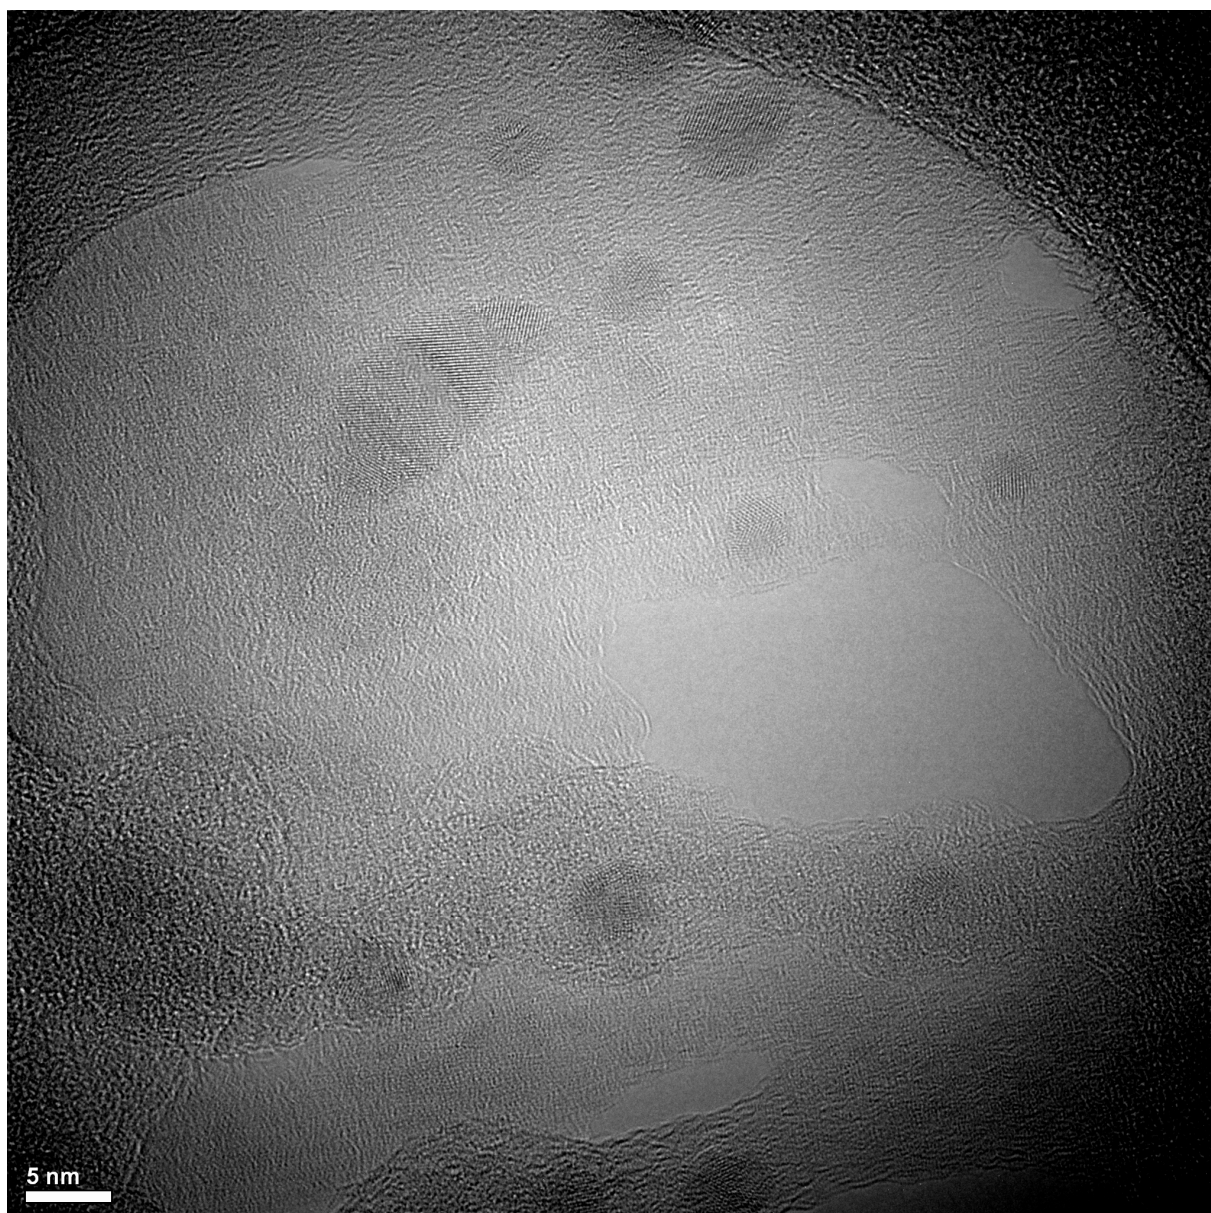

Figure S3: Cluster of nanocrystals at the periphery of the ion track at the irradiation dose of  $5 \times 10^{11}$  ion/cm<sup>2</sup>, ion energy is 167 MeV.
